# Supplementary material for: An optimized workflow for CRISPR-Cas9 deletion of surface and intracellular factors in primary human T lymphocytes
Source: PubMed Central journal article supplement (PMC7891767; doi:10.1371/journal.pone.0247232), 2021-02-18
Supplement: pone.0247232.s001.pdf [file pone.0247232.s001.pdf]

Method used to capture image:

UV detection of DNA samples separated on agarose gel containing  
RedSafe Nucleic Acid Staining Solution  
Image was acquired with Ingenius3

Figure panel generated from thimage: 1F.

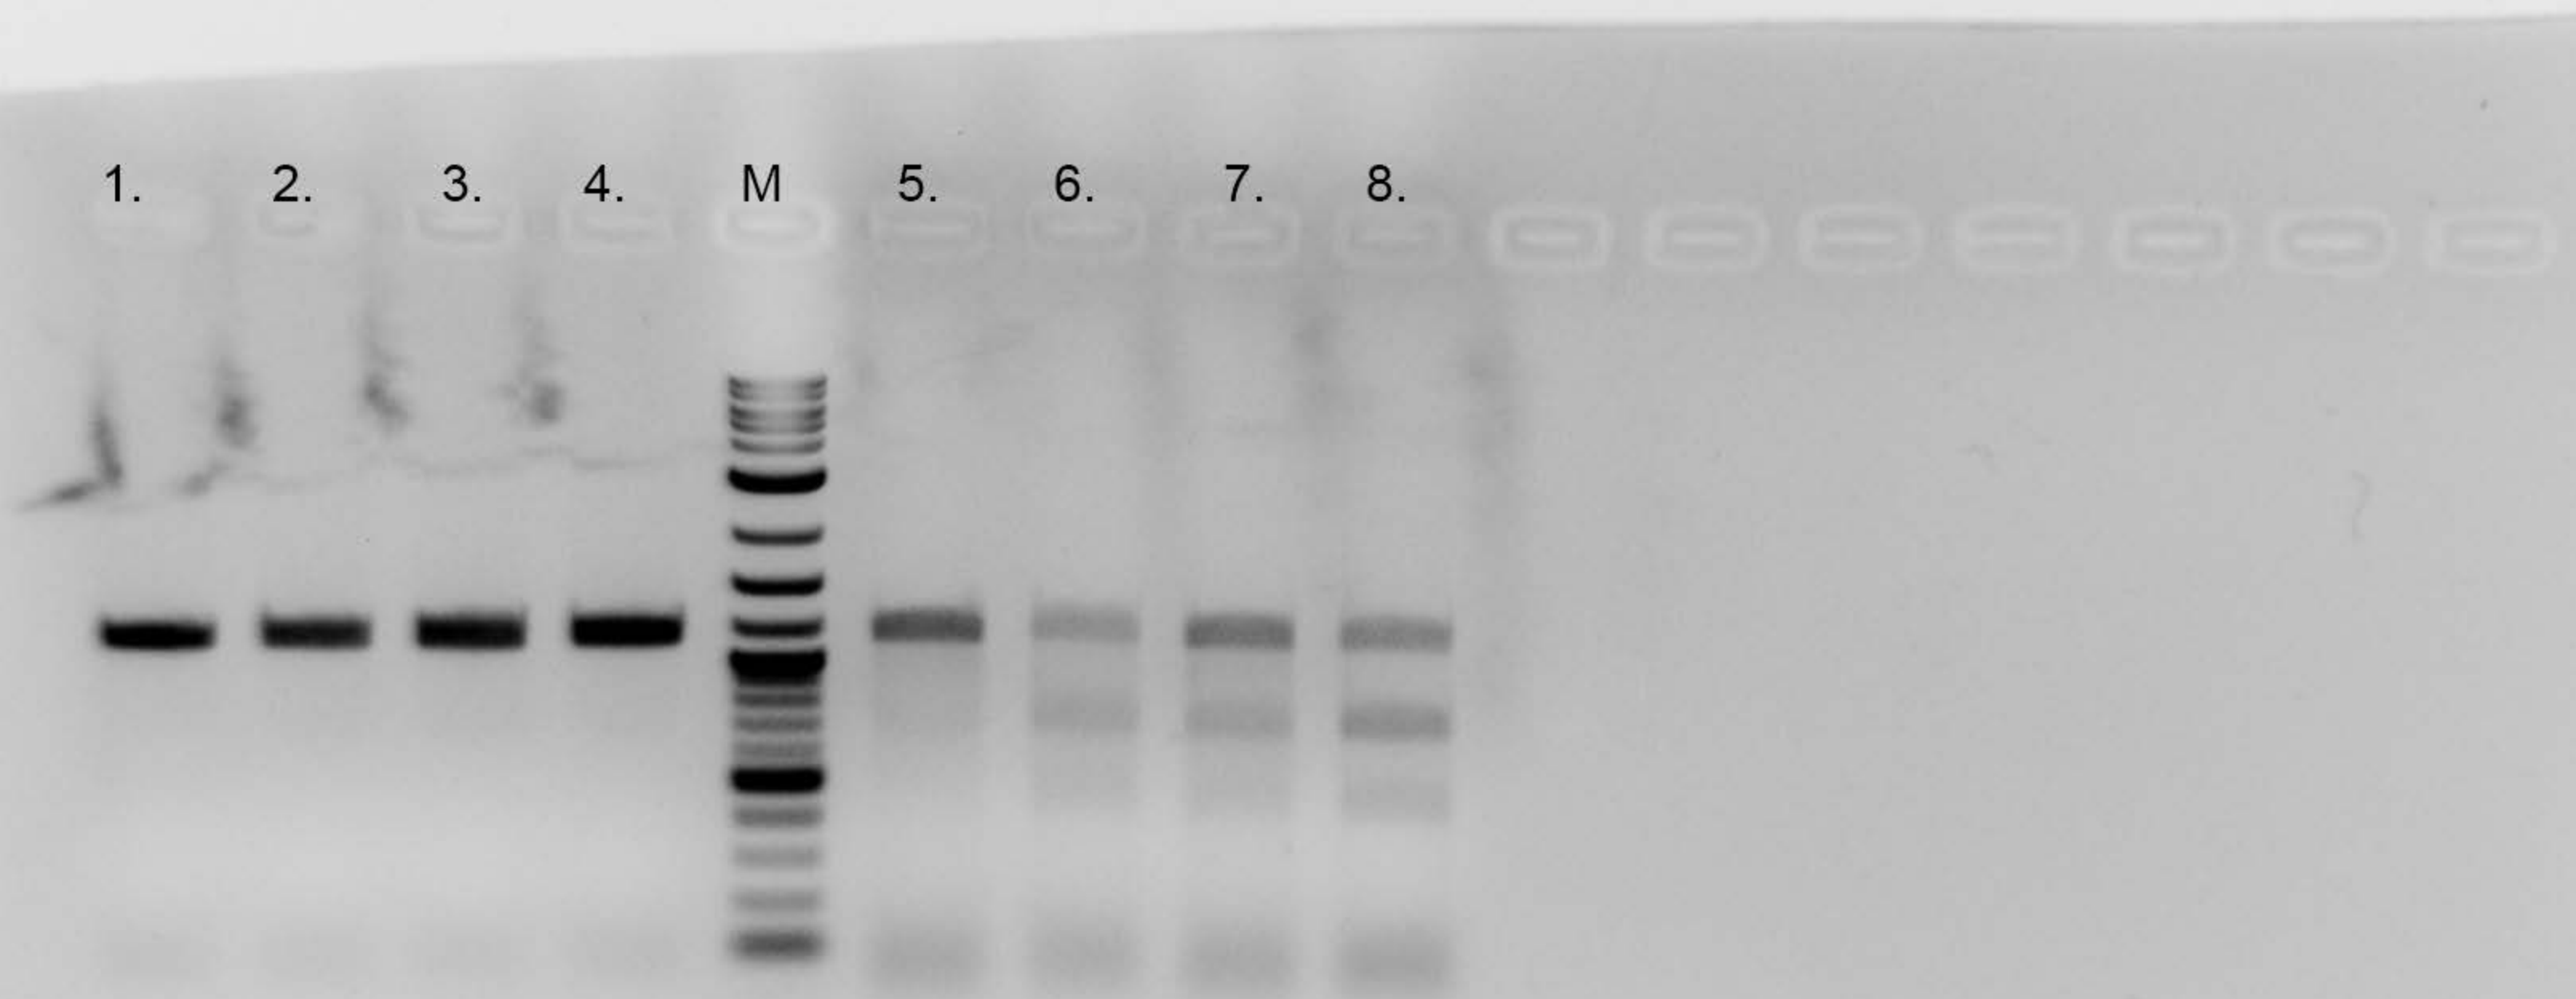

1. No RNP control
  2. mix population
  3. sorted CD3+
  4. sorted CD3-
- M = marker 1kb NEB
5. No RNP control
  6. mix population
  7. sorted CD3+
  8. sorted CD3-

Undigested  
PCR

T7 endonuclease I  
digested PCR

Method used to capture image: UV detection of DNA samples separated on agarose gel containing RedSafe Nucleic Acid Staining Solution

Figure panel generated from this image: 3D.

M = marker

1. clone nr. 53

2. clone nr. 54

3. clone nr. 55

4. clone nr. 67

5. clone nr. 72

6. control sample 1

7. control sample 2

+ RNP  
ZC3H12D

No  
RNP

Undigested  
PCR

8. clone nr. 53

9. clone nr. 54

10. clone nr. 55

11. clone nr. 67

12. clone nr. 72

13. control sample 1

14. control sample 2

+RNP  
ZC3H12D

No

RNP

PCR

digested with

T7 endonuclease I

marker 1kb Plus DNA  
ladder (NEB)

Pictures were acquired with Ingenius3

M 1. 2. 3. 4. 5. 6. 7. X. 8. 9. 10. 11. 12. 13. 14.

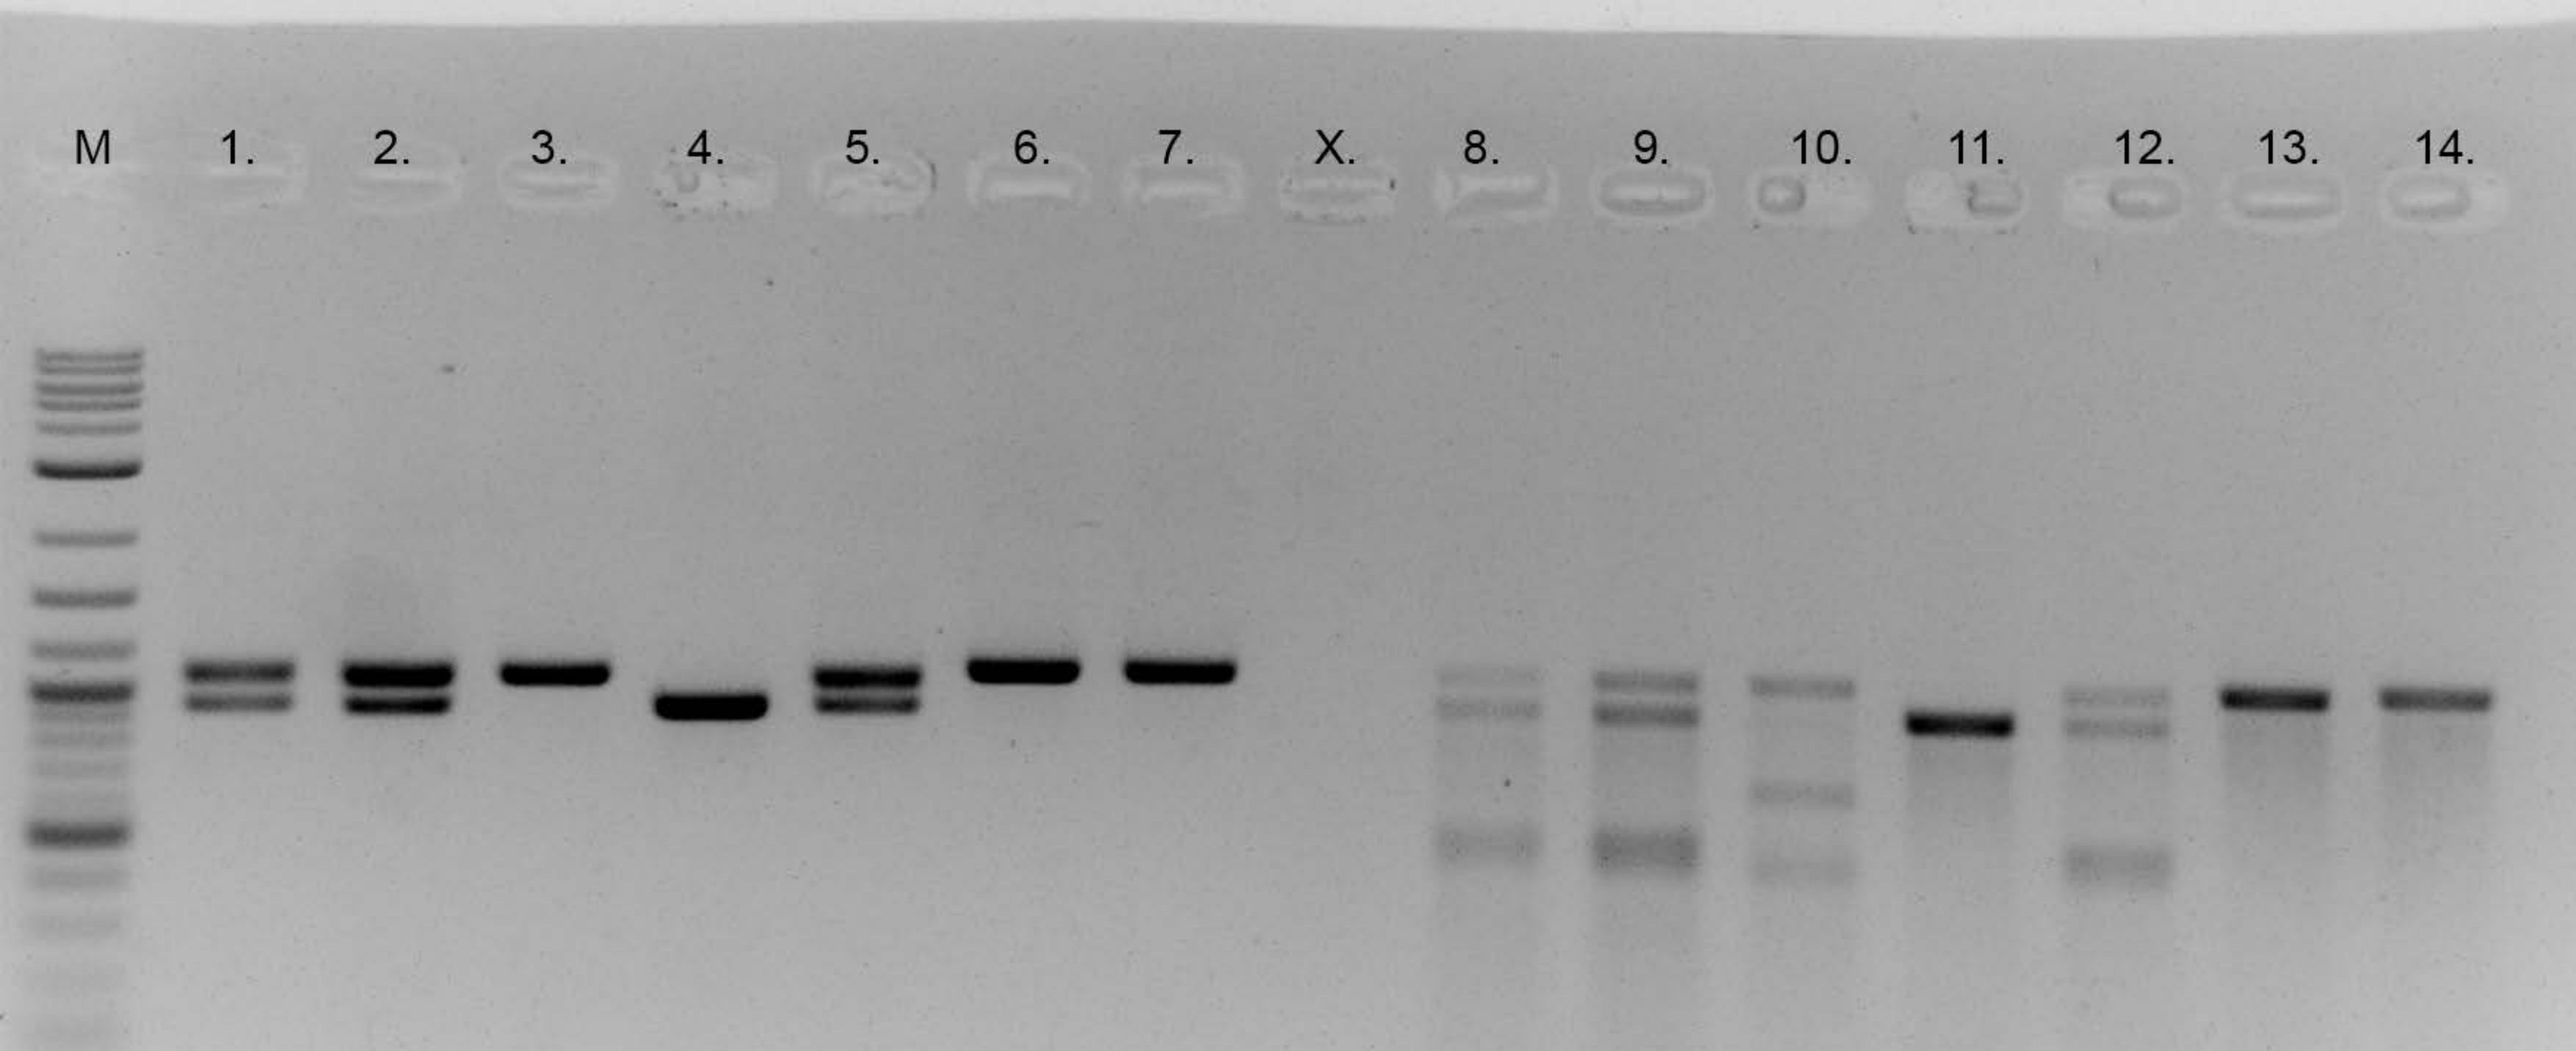

Method used to capture image: UV detection of DNA samples separated on agarose gel containing RedSafe Nucleic Acid Staining Solution

Figure panel generated from this image: 3F.

M = Marker low molecular weight DNA ladder NEB

1. clone nr. 8  
2. clone nr. 29  
3. clone nr. 33  
4. clone nr. 35  
5. clone nr. 36  
6. clone nr. 53  
7. clone nr. 54  
8. clone nr. 55  
9. clone nr. 67  
10. clone nr. 72

+ RNP

11. control sample nr. 1  
12. control sample nr. 2  
13. control sample nr. 3  
14. control sample nr. 4  
15. control sample nr. 5

No RNP control

Pictures were acquired with Ingenius3

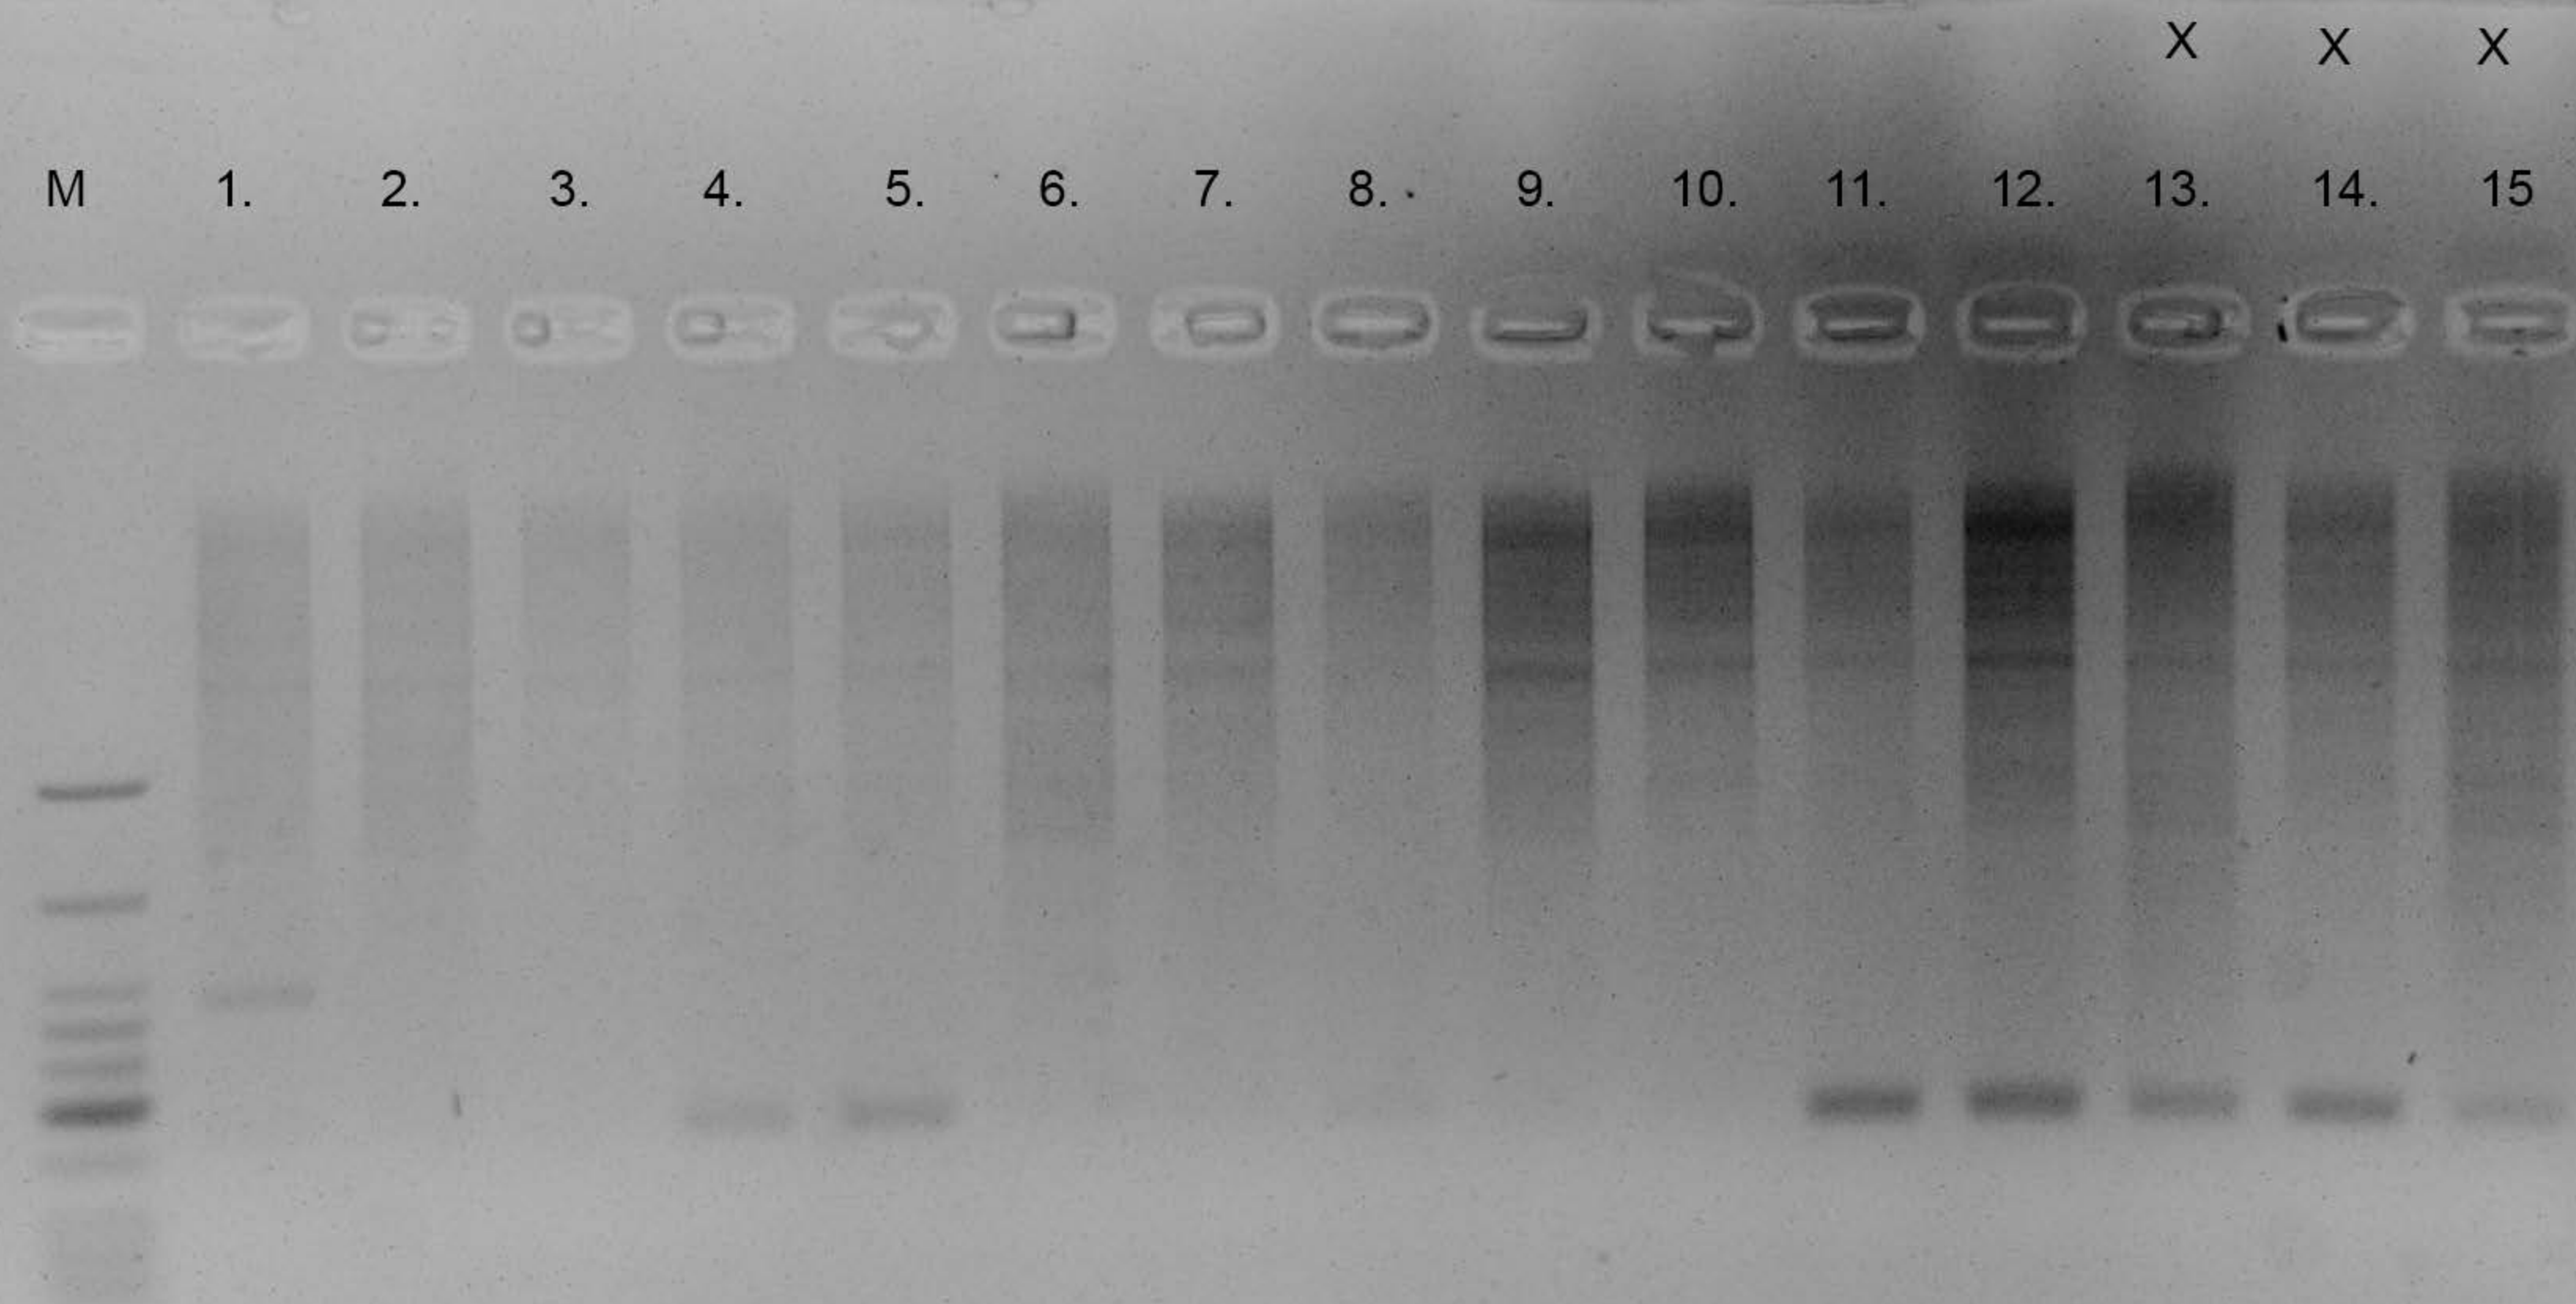



Method used to capture image: UV detection of DNA samples separated on agarose gel containing RedSafe Nucleic Acid Staining Solution

Image was acquired with Ingenius3

Figure panel for image 5C

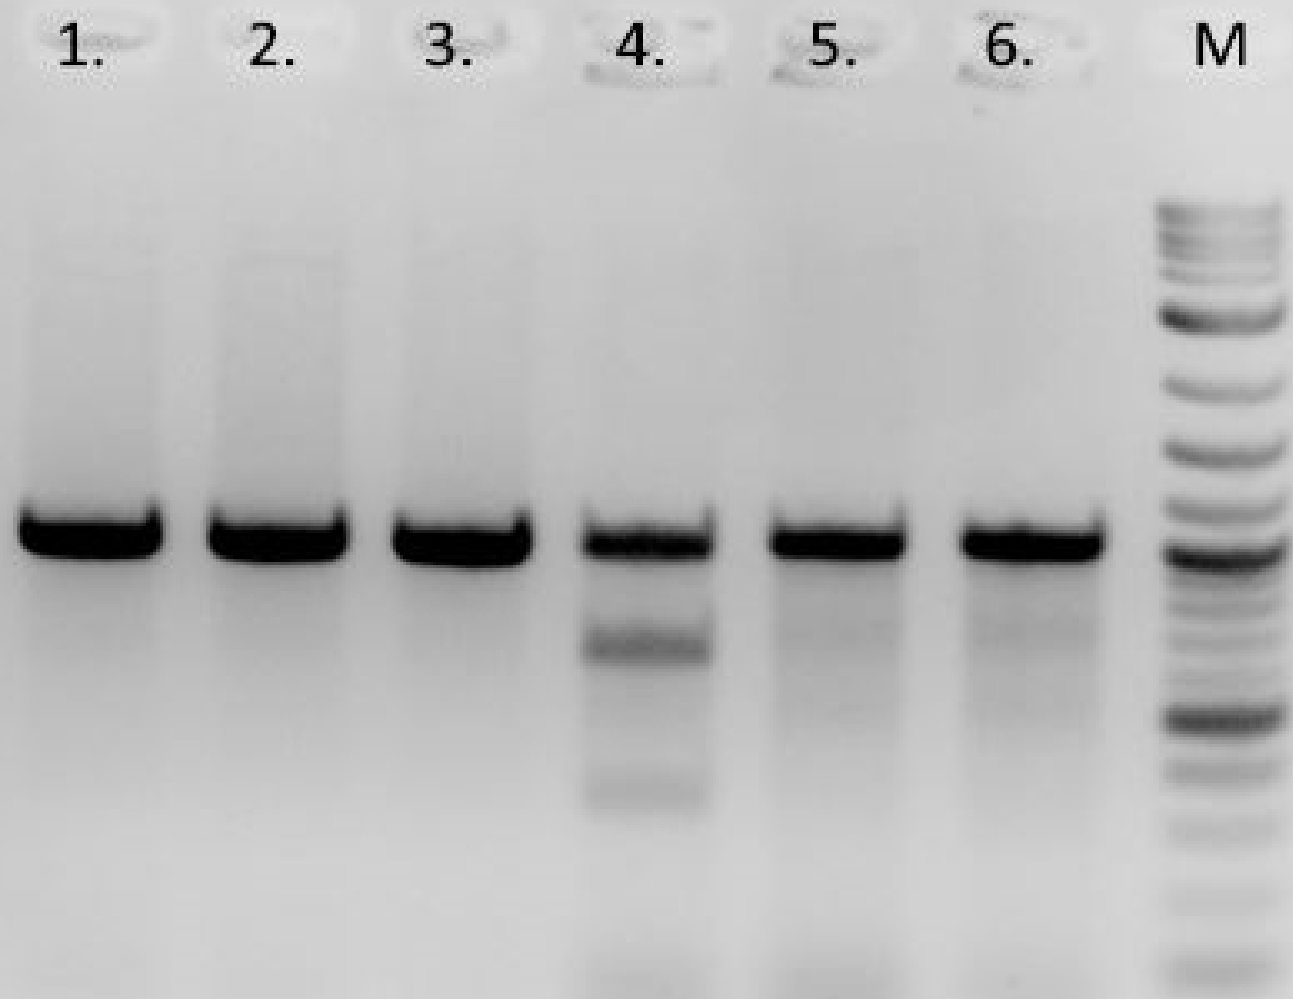

- 1. clone 9
- 2. clone 2
- 3. control 3
- 4. clone 9
- 5. clone 2
- 6. control 3

No T7 Endonuclease I

+T7 Endonuclease I
